# Supplementary material for: Safety of Dienogest and Other Hormonal Treatments for Endometriosis in Real-World Clinical Practice (VIPOS): A Large Noninterventional Study
Source: PubMed Central journal article supplement — Adv Ther. 2020 Apr 16;37(5):2528–37. doi: 10.1007/s12325-020-01331-z (PMC7467487; doi:10.1007/s12325-020-01331-z), 2020-04-16
Supplement: 12325_2020_1331_MOESM1_ESM.pdf [file 12325_2020_1331_MOESM1_ESM.pdf]

## INAS-VIPOS

International Active Surveillance Study of Medication Used for the Treatment of Endometriosis:  
Visanne Post-approval Observational Study

### – Baseline Questionnaire –

Country Physician no. Patient no. ID

If you have any questions, please call our toll-free number: [telephone number].

#### To be filled in by the physician!

1. What is the name of the medication for endometriosis that you prescribed to your patient today? <sub>1</sub>  
\_\_\_\_\_
- 1a. If you prescribed an oral contraceptive today, have you prescribed an extended regimen? <sub>2</sub>  
 No                       Yes
2. Please tick the appropriate box to describe today's prescription: <sub>3</sub>  
 First-time hormonal prescription/no previous hormonal treatment  
 Repeat of the same hormonal treatment after a medication break of at least 4 weeks  
 Switching from another hormonal treatment without a relevant break (< 4 weeks)  
 Switching from another hormonal treatment after a break of at least 4 weeks
3. How would you classify your patient's endometriosis? <sub>4</sub>  
 Diagnosis based only on clinical symptoms  
 Endometriosis confirmed via surgery / laparoscopy
4. In the last 2 years, how many surgical procedures (diagnostic and/or therapeutical) has your patient received for the management of her endometriosis?  
 Number of surgical procedures:     <sub>5</sub>

#### To be filled in by the study participant!

##### Personal Data

5. Please give your date of birth:      <sub>6</sub> /   <sub>7</sub> /     <sub>8</sub>  
day month year

6. What is your height?      <sub>9</sub> cm

7. What is your weight?       <sub>10</sub> kg

##### Gynecological History

8. How old were you when you had your first menstrual bleeding?      <sub>11</sub> years

9. Have you ever been pregnant? <sub>12</sub>  
 No → go to question 10                       Yes

9a. If yes, when did you last give birth?      <sub>13</sub> /   <sub>14</sub> /    <sub>15</sub>  
day month year

9b. How many live births have you had?     <sub>16</sub>

9c. How many abortions/miscarriages/still births have you had?     <sub>17</sub>

##### Endometriosis

10a. When did you first experience endometriosis symptoms?      <sub>18</sub> /     <sub>19</sub>  
month year

10b. When were you first diagnosed with endometriosis by a physician?      <sub>20</sub> /     <sub>21</sub>  
month year

**11. What symptoms do you have associated with your endometriosis? (please tick all that apply)**

- Pelvic pain unrelated to period pain <sup>22</sup>
- Experienced pain during or after sexual intercourse <sup>23</sup>
- Difficulty conceiving/infertility <sup>24</sup>
- Painful periods <sup>25</sup>
- Heavy or irregular bleeding <sup>26</sup>
- Pain when passing urine <sup>27</sup>
- Pain during bowel movement <sup>28</sup>
- Constipation or diarrhoea <sup>29</sup>
- Tiredness / Weakness <sup>30</sup>
- Other; which: <sup>31</sup> \_\_\_\_\_ <sup>32</sup>

**12. Have you had disabling pain associated with your endometriosis preventing you from working or attending social events on at least two days in the last 4 weeks? <sup>33</sup>**

- No                       Yes

**13. Please rate the pain associated with your endometriosis by marking the box that best describes your pain over the last 4 weeks, with 0 being no pain and 10 being unbearable pain. <sup>34</sup>**

no pain     0     1     2     3     4     5     6     7     8     9     10    unbearable pain

**14. Have you had an operation to diagnose and/or treat your endometriosis? <sup>35</sup>**

- No → go on to question 15                       Yes

If **yes**, please list the operation (if known) and the date of the operation in the table below (i.e. excision of lesions, removal of ovarian cyst, hysterectomy, colonoscopy, keyhole surgery, diagnostic laparoscopy)  
For additional space, use comment section on page 4.

| Operation <sup>36</sup> | Date                                                                                                                                                                                                                                                                                                                                                                                                                                                                                                                                                                                                                                           |      |   |   |   |   |   |       |  |      |  |  |  |
|-------------------------|------------------------------------------------------------------------------------------------------------------------------------------------------------------------------------------------------------------------------------------------------------------------------------------------------------------------------------------------------------------------------------------------------------------------------------------------------------------------------------------------------------------------------------------------------------------------------------------------------------------------------------------------|------|---|---|---|---|---|-------|--|------|--|--|--|
|                         | <table style="margin: auto; border: none;"> <tr> <td style="border: 1px solid black; padding: 2px;">M</td><td style="border: 1px solid black; padding: 2px;">M</td><td style="border: 1px solid black; padding: 2px;">Y</td><td style="border: 1px solid black; padding: 2px;">Y</td><td style="border: 1px solid black; padding: 2px;">Y</td><td style="border: 1px solid black; padding: 2px;">Y</td> </tr> <tr> <td colspan="2" style="text-align: center; font-size: 8px;">month</td> <td colspan="4" style="text-align: center; font-size: 8px;">year</td> </tr> </table> <small><sup>37</sup>                      <sup>38</sup></small> | M    | M | Y | Y | Y | Y | month |  | year |  |  |  |
| M                       | M                                                                                                                                                                                                                                                                                                                                                                                                                                                                                                                                                                                                                                              | Y    | Y | Y | Y |   |   |       |  |      |  |  |  |
| month                   |                                                                                                                                                                                                                                                                                                                                                                                                                                                                                                                                                                                                                                                | year |   |   |   |   |   |       |  |      |  |  |  |
|                         | <table style="margin: auto; border: none;"> <tr> <td style="border: 1px solid black; padding: 2px;">M</td><td style="border: 1px solid black; padding: 2px;">M</td><td style="border: 1px solid black; padding: 2px;">Y</td><td style="border: 1px solid black; padding: 2px;">Y</td><td style="border: 1px solid black; padding: 2px;">Y</td><td style="border: 1px solid black; padding: 2px;">Y</td> </tr> <tr> <td colspan="2" style="text-align: center; font-size: 8px;">month</td> <td colspan="4" style="text-align: center; font-size: 8px;">year</td> </tr> </table>                                                                 | M    | M | Y | Y | Y | Y | month |  | year |  |  |  |
| M                       | M                                                                                                                                                                                                                                                                                                                                                                                                                                                                                                                                                                                                                                              | Y    | Y | Y | Y |   |   |       |  |      |  |  |  |
| month                   |                                                                                                                                                                                                                                                                                                                                                                                                                                                                                                                                                                                                                                                | year |   |   |   |   |   |       |  |      |  |  |  |
|                         | <table style="margin: auto; border: none;"> <tr> <td style="border: 1px solid black; padding: 2px;">M</td><td style="border: 1px solid black; padding: 2px;">M</td><td style="border: 1px solid black; padding: 2px;">Y</td><td style="border: 1px solid black; padding: 2px;">Y</td><td style="border: 1px solid black; padding: 2px;">Y</td><td style="border: 1px solid black; padding: 2px;">Y</td> </tr> <tr> <td colspan="2" style="text-align: center; font-size: 8px;">month</td> <td colspan="4" style="text-align: center; font-size: 8px;">year</td> </tr> </table>                                                                 | M    | M | Y | Y | Y | Y | month |  | year |  |  |  |
| M                       | M                                                                                                                                                                                                                                                                                                                                                                                                                                                                                                                                                                                                                                              | Y    | Y | Y | Y |   |   |       |  |      |  |  |  |
| month                   |                                                                                                                                                                                                                                                                                                                                                                                                                                                                                                                                                                                                                                                | year |   |   |   |   |   |       |  |      |  |  |  |
|                         | <table style="margin: auto; border: none;"> <tr> <td style="border: 1px solid black; padding: 2px;">M</td><td style="border: 1px solid black; padding: 2px;">M</td><td style="border: 1px solid black; padding: 2px;">Y</td><td style="border: 1px solid black; padding: 2px;">Y</td><td style="border: 1px solid black; padding: 2px;">Y</td><td style="border: 1px solid black; padding: 2px;">Y</td> </tr> <tr> <td colspan="2" style="text-align: center; font-size: 8px;">month</td> <td colspan="4" style="text-align: center; font-size: 8px;">year</td> </tr> </table>                                                                 | M    | M | Y | Y | Y | Y | month |  | year |  |  |  |
| M                       | M                                                                                                                                                                                                                                                                                                                                                                                                                                                                                                                                                                                                                                              | Y    | Y | Y | Y |   |   |       |  |      |  |  |  |
| month                   |                                                                                                                                                                                                                                                                                                                                                                                                                                                                                                                                                                                                                                                | year |   |   |   |   |   |       |  |      |  |  |  |

**15. Before today's prescription, have you been prescribed any other medication for the treatment of endometriosis? <sup>39</sup>**

- No → go on to question 16                       Yes

If **yes**, please list **all the prescribed medications** you have used in the **last 2 years**. (i.e. prescribed pain killers, oral contraceptive, IUD, progestine, GnRH). Also give the duration of use (start and stop date). For additional space, use comment section on page 4.

| Name (type) of medication <sup>40</sup> | from                                                                                                                                                                                                                                                                                                                                                                                                                                                                                                                                                                                                                                           | to   |   |   |   |   |   |       |  |      |  |  |  |                                                                                                                                                                                                                                                                                                                                                                                                                                                                                                                                                                                                                                                                                               |   |   |   |   |   |   |       |  |      |  |  |  |
|-----------------------------------------|------------------------------------------------------------------------------------------------------------------------------------------------------------------------------------------------------------------------------------------------------------------------------------------------------------------------------------------------------------------------------------------------------------------------------------------------------------------------------------------------------------------------------------------------------------------------------------------------------------------------------------------------|------|---|---|---|---|---|-------|--|------|--|--|--|-----------------------------------------------------------------------------------------------------------------------------------------------------------------------------------------------------------------------------------------------------------------------------------------------------------------------------------------------------------------------------------------------------------------------------------------------------------------------------------------------------------------------------------------------------------------------------------------------------------------------------------------------------------------------------------------------|---|---|---|---|---|---|-------|--|------|--|--|--|
|                                         | <table style="margin: auto; border: none;"> <tr> <td style="border: 1px solid black; padding: 2px;">M</td><td style="border: 1px solid black; padding: 2px;">M</td><td style="border: 1px solid black; padding: 2px;">Y</td><td style="border: 1px solid black; padding: 2px;">Y</td><td style="border: 1px solid black; padding: 2px;">Y</td><td style="border: 1px solid black; padding: 2px;">Y</td> </tr> <tr> <td colspan="2" style="text-align: center; font-size: 8px;">month</td> <td colspan="4" style="text-align: center; font-size: 8px;">year</td> </tr> </table> <small><sup>41</sup>                      <sup>42</sup></small> | M    | M | Y | Y | Y | Y | month |  | year |  |  |  | <table style="margin: auto; border: none;"> <tr> <td style="border: 1px solid black; padding: 2px;">M</td><td style="border: 1px solid black; padding: 2px;">M</td><td style="border: 1px solid black; padding: 2px;">Y</td><td style="border: 1px solid black; padding: 2px;">Y</td><td style="border: 1px solid black; padding: 2px;">Y</td><td style="border: 1px solid black; padding: 2px;">Y</td> </tr> <tr> <td colspan="2" style="text-align: center; font-size: 8px;">month</td> <td colspan="4" style="text-align: center; font-size: 8px;">year</td> </tr> </table> <small><sup>43</sup>                      <sup>44</sup></small> <input type="checkbox"/> ongoing <sup>45</sup> | M | M | Y | Y | Y | Y | month |  | year |  |  |  |
| M                                       | M                                                                                                                                                                                                                                                                                                                                                                                                                                                                                                                                                                                                                                              | Y    | Y | Y | Y |   |   |       |  |      |  |  |  |                                                                                                                                                                                                                                                                                                                                                                                                                                                                                                                                                                                                                                                                                               |   |   |   |   |   |   |       |  |      |  |  |  |
| month                                   |                                                                                                                                                                                                                                                                                                                                                                                                                                                                                                                                                                                                                                                | year |   |   |   |   |   |       |  |      |  |  |  |                                                                                                                                                                                                                                                                                                                                                                                                                                                                                                                                                                                                                                                                                               |   |   |   |   |   |   |       |  |      |  |  |  |
| M                                       | M                                                                                                                                                                                                                                                                                                                                                                                                                                                                                                                                                                                                                                              | Y    | Y | Y | Y |   |   |       |  |      |  |  |  |                                                                                                                                                                                                                                                                                                                                                                                                                                                                                                                                                                                                                                                                                               |   |   |   |   |   |   |       |  |      |  |  |  |
| month                                   |                                                                                                                                                                                                                                                                                                                                                                                                                                                                                                                                                                                                                                                | year |   |   |   |   |   |       |  |      |  |  |  |                                                                                                                                                                                                                                                                                                                                                                                                                                                                                                                                                                                                                                                                                               |   |   |   |   |   |   |       |  |      |  |  |  |
|                                         | <table style="margin: auto; border: none;"> <tr> <td style="border: 1px solid black; padding: 2px;">M</td><td style="border: 1px solid black; padding: 2px;">M</td><td style="border: 1px solid black; padding: 2px;">Y</td><td style="border: 1px solid black; padding: 2px;">Y</td><td style="border: 1px solid black; padding: 2px;">Y</td><td style="border: 1px solid black; padding: 2px;">Y</td> </tr> <tr> <td colspan="2" style="text-align: center; font-size: 8px;">month</td> <td colspan="4" style="text-align: center; font-size: 8px;">year</td> </tr> </table>                                                                 | M    | M | Y | Y | Y | Y | month |  | year |  |  |  | <table style="margin: auto; border: none;"> <tr> <td style="border: 1px solid black; padding: 2px;">M</td><td style="border: 1px solid black; padding: 2px;">M</td><td style="border: 1px solid black; padding: 2px;">Y</td><td style="border: 1px solid black; padding: 2px;">Y</td><td style="border: 1px solid black; padding: 2px;">Y</td><td style="border: 1px solid black; padding: 2px;">Y</td> </tr> <tr> <td colspan="2" style="text-align: center; font-size: 8px;">month</td> <td colspan="4" style="text-align: center; font-size: 8px;">year</td> </tr> </table> <input type="checkbox"/> ongoing                                                                               | M | M | Y | Y | Y | Y | month |  | year |  |  |  |
| M                                       | M                                                                                                                                                                                                                                                                                                                                                                                                                                                                                                                                                                                                                                              | Y    | Y | Y | Y |   |   |       |  |      |  |  |  |                                                                                                                                                                                                                                                                                                                                                                                                                                                                                                                                                                                                                                                                                               |   |   |   |   |   |   |       |  |      |  |  |  |
| month                                   |                                                                                                                                                                                                                                                                                                                                                                                                                                                                                                                                                                                                                                                | year |   |   |   |   |   |       |  |      |  |  |  |                                                                                                                                                                                                                                                                                                                                                                                                                                                                                                                                                                                                                                                                                               |   |   |   |   |   |   |       |  |      |  |  |  |
| M                                       | M                                                                                                                                                                                                                                                                                                                                                                                                                                                                                                                                                                                                                                              | Y    | Y | Y | Y |   |   |       |  |      |  |  |  |                                                                                                                                                                                                                                                                                                                                                                                                                                                                                                                                                                                                                                                                                               |   |   |   |   |   |   |       |  |      |  |  |  |
| month                                   |                                                                                                                                                                                                                                                                                                                                                                                                                                                                                                                                                                                                                                                | year |   |   |   |   |   |       |  |      |  |  |  |                                                                                                                                                                                                                                                                                                                                                                                                                                                                                                                                                                                                                                                                                               |   |   |   |   |   |   |       |  |      |  |  |  |
|                                         | <table style="margin: auto; border: none;"> <tr> <td style="border: 1px solid black; padding: 2px;">M</td><td style="border: 1px solid black; padding: 2px;">M</td><td style="border: 1px solid black; padding: 2px;">Y</td><td style="border: 1px solid black; padding: 2px;">Y</td><td style="border: 1px solid black; padding: 2px;">Y</td><td style="border: 1px solid black; padding: 2px;">Y</td> </tr> <tr> <td colspan="2" style="text-align: center; font-size: 8px;">month</td> <td colspan="4" style="text-align: center; font-size: 8px;">year</td> </tr> </table>                                                                 | M    | M | Y | Y | Y | Y | month |  | year |  |  |  | <table style="margin: auto; border: none;"> <tr> <td style="border: 1px solid black; padding: 2px;">M</td><td style="border: 1px solid black; padding: 2px;">M</td><td style="border: 1px solid black; padding: 2px;">Y</td><td style="border: 1px solid black; padding: 2px;">Y</td><td style="border: 1px solid black; padding: 2px;">Y</td><td style="border: 1px solid black; padding: 2px;">Y</td> </tr> <tr> <td colspan="2" style="text-align: center; font-size: 8px;">month</td> <td colspan="4" style="text-align: center; font-size: 8px;">year</td> </tr> </table> <input type="checkbox"/> ongoing                                                                               | M | M | Y | Y | Y | Y | month |  | year |  |  |  |
| M                                       | M                                                                                                                                                                                                                                                                                                                                                                                                                                                                                                                                                                                                                                              | Y    | Y | Y | Y |   |   |       |  |      |  |  |  |                                                                                                                                                                                                                                                                                                                                                                                                                                                                                                                                                                                                                                                                                               |   |   |   |   |   |   |       |  |      |  |  |  |
| month                                   |                                                                                                                                                                                                                                                                                                                                                                                                                                                                                                                                                                                                                                                | year |   |   |   |   |   |       |  |      |  |  |  |                                                                                                                                                                                                                                                                                                                                                                                                                                                                                                                                                                                                                                                                                               |   |   |   |   |   |   |       |  |      |  |  |  |
| M                                       | M                                                                                                                                                                                                                                                                                                                                                                                                                                                                                                                                                                                                                                              | Y    | Y | Y | Y |   |   |       |  |      |  |  |  |                                                                                                                                                                                                                                                                                                                                                                                                                                                                                                                                                                                                                                                                                               |   |   |   |   |   |   |       |  |      |  |  |  |
| month                                   |                                                                                                                                                                                                                                                                                                                                                                                                                                                                                                                                                                                                                                                | year |   |   |   |   |   |       |  |      |  |  |  |                                                                                                                                                                                                                                                                                                                                                                                                                                                                                                                                                                                                                                                                                               |   |   |   |   |   |   |       |  |      |  |  |  |
|                                         | <table style="margin: auto; border: none;"> <tr> <td style="border: 1px solid black; padding: 2px;">M</td><td style="border: 1px solid black; padding: 2px;">M</td><td style="border: 1px solid black; padding: 2px;">Y</td><td style="border: 1px solid black; padding: 2px;">Y</td><td style="border: 1px solid black; padding: 2px;">Y</td><td style="border: 1px solid black; padding: 2px;">Y</td> </tr> <tr> <td colspan="2" style="text-align: center; font-size: 8px;">month</td> <td colspan="4" style="text-align: center; font-size: 8px;">year</td> </tr> </table>                                                                 | M    | M | Y | Y | Y | Y | month |  | year |  |  |  | <table style="margin: auto; border: none;"> <tr> <td style="border: 1px solid black; padding: 2px;">M</td><td style="border: 1px solid black; padding: 2px;">M</td><td style="border: 1px solid black; padding: 2px;">Y</td><td style="border: 1px solid black; padding: 2px;">Y</td><td style="border: 1px solid black; padding: 2px;">Y</td><td style="border: 1px solid black; padding: 2px;">Y</td> </tr> <tr> <td colspan="2" style="text-align: center; font-size: 8px;">month</td> <td colspan="4" style="text-align: center; font-size: 8px;">year</td> </tr> </table> <input type="checkbox"/> ongoing                                                                               | M | M | Y | Y | Y | Y | month |  | year |  |  |  |
| M                                       | M                                                                                                                                                                                                                                                                                                                                                                                                                                                                                                                                                                                                                                              | Y    | Y | Y | Y |   |   |       |  |      |  |  |  |                                                                                                                                                                                                                                                                                                                                                                                                                                                                                                                                                                                                                                                                                               |   |   |   |   |   |   |       |  |      |  |  |  |
| month                                   |                                                                                                                                                                                                                                                                                                                                                                                                                                                                                                                                                                                                                                                | year |   |   |   |   |   |       |  |      |  |  |  |                                                                                                                                                                                                                                                                                                                                                                                                                                                                                                                                                                                                                                                                                               |   |   |   |   |   |   |       |  |      |  |  |  |
| M                                       | M                                                                                                                                                                                                                                                                                                                                                                                                                                                                                                                                                                                                                                              | Y    | Y | Y | Y |   |   |       |  |      |  |  |  |                                                                                                                                                                                                                                                                                                                                                                                                                                                                                                                                                                                                                                                                                               |   |   |   |   |   |   |       |  |      |  |  |  |
| month                                   |                                                                                                                                                                                                                                                                                                                                                                                                                                                                                                                                                                                                                                                | year |   |   |   |   |   |       |  |      |  |  |  |                                                                                                                                                                                                                                                                                                                                                                                                                                                                                                                                                                                                                                                                                               |   |   |   |   |   |   |       |  |      |  |  |  |

**Medication**

**16. Are you taking any other medication on a regular basis? (EXCLUDING today's prescription) <sup>46</sup>**

- No                       Yes, which one(s)? (please use Trade Name if known)

\_\_\_\_\_

\_\_\_\_\_ <sup>47</sup>

**17. Beyond today's prescribed medication, what are you currently doing to alleviate your endometriosis symptoms?**

- Non-prescription pain killers <sup>48</sup>
- Natural/herbal products <sup>49</sup>
- Acupuncture <sup>50</sup>
- Dietary modification <sup>51</sup>
- Massage/manual therapy <sup>52</sup>
- Home remedies (eg. hot water bottle) <sup>53</sup>
- Nothing else <sup>54</sup>
- Other; please specify <sup>55</sup> \_\_\_\_\_ <sup>56</sup>

**Medical History**

**18. Have you ever been told by a physician that you had or have any of the following diseases or conditions? Please also indicate whether this disease or condition was treated by a physician.**

|                                                                                                      |                             |                                                                                                                                                                                                                                                                                                                                                                                                                                                                                                                                                                                              |
|------------------------------------------------------------------------------------------------------|-----------------------------|----------------------------------------------------------------------------------------------------------------------------------------------------------------------------------------------------------------------------------------------------------------------------------------------------------------------------------------------------------------------------------------------------------------------------------------------------------------------------------------------------------------------------------------------------------------------------------------------|
| <p><b>Deep venous thrombosis</b> <sup>57</sup><br/>(blood clot in the deep veins e.g. legs/arms)</p> | <input type="checkbox"/> No | <input type="checkbox"/> Yes, in <input type="text" value="M M"/> <input type="text" value="Y Y Y Y"/> <sub>month 58 year 59</sub><br><br>I was treated by a physician <sup>60</sup> <input type="checkbox"/> Yes <input type="checkbox"/> No<br>I was treated with blood-thinning drugs <sup>61</sup> <input type="checkbox"/> Yes <input type="checkbox"/> No                                                                                                                                                                                                                              |
| <p><b>Pulmonary embolism</b> <sup>62</sup><br/>(blood clot in the lung)</p>                          | <input type="checkbox"/> No | <input type="checkbox"/> Yes, in <input type="text" value="M M"/> <input type="text" value="Y Y Y Y"/> <sub>month 63 year 64</sub><br><br>I was treated by a physician <sup>65</sup> <input type="checkbox"/> Yes <input type="checkbox"/> No<br>I was treated with blood-thinning drugs <sup>66</sup> <input type="checkbox"/> Yes <input type="checkbox"/> No                                                                                                                                                                                                                              |
| <p><b>Myocardial infarction</b> <sup>67</sup><br/>(heart attack)</p>                                 | <input type="checkbox"/> No | <input type="checkbox"/> Yes, in <input type="text" value="M M"/> <input type="text" value="Y Y Y Y"/> <sub>month 68 year 69</sub><br><br>I was treated by a physician <sup>70</sup> <input type="checkbox"/> Yes <input type="checkbox"/> No<br>If yes, was an ECG performed? <sup>71</sup> <input type="checkbox"/> Yes <input type="checkbox"/> No<br>Was the infarction confirmed by an ECG? <sup>72</sup> <input type="checkbox"/> Yes <input type="checkbox"/> No                                                                                                                      |
| <p><b>Stroke</b> <sup>73</sup></p>                                                                   | <input type="checkbox"/> No | <input type="checkbox"/> Yes, in <input type="text" value="M M"/> <input type="text" value="Y Y Y Y"/> <sub>month 74 year 75</sub><br><br>I was treated by a physician <sup>76</sup> <input type="checkbox"/> Yes <input type="checkbox"/> No                                                                                                                                                                                                                                                                                                                                                |
| <p><b>Anemia</b> <sup>77</sup></p>                                                                   | <input type="checkbox"/> No | <input type="checkbox"/> Yes, diagnosed in <input type="text" value="M M"/> <input type="text" value="Y Y Y Y"/> <sub>month 78 year 79</sub><br><br>I was treated by a physician <sup>80</sup> <input type="checkbox"/> Yes <input type="checkbox"/> No<br>I received a blood or iron trans-/infusion <sup>81</sup> <input type="checkbox"/> Yes <input type="checkbox"/> No<br>I took iron tablets <sup>82</sup> <input type="checkbox"/> Yes <input type="checkbox"/> No                                                                                                                   |
| <p><b>Depression requiring treatment</b> <sup>83</sup></p>                                           | <input type="checkbox"/> No | <input type="checkbox"/> Yes, diagnosed in <input type="text" value="M M"/> <input type="text" value="Y Y Y Y"/> <sub>month 84 year 85</sub><br><br>I was treated by a general practitioner <sup>86</sup> <input type="checkbox"/> Yes <input type="checkbox"/> No<br>I was treated by a psychiatrist <sup>87</sup> <input type="checkbox"/> Yes <input type="checkbox"/> No<br>I was admitted to hospital <sup>88</sup> <input type="checkbox"/> Yes <input type="checkbox"/> No<br>There was a suicide attempt <sup>89</sup> <input type="checkbox"/> Yes <input type="checkbox"/> No      |
| <p><b>Cancer</b> <sup>90</sup><br/>(e.g. Breast cancer)</p>                                          | <input type="checkbox"/> No | <input type="checkbox"/> Yes, diagnosed in <input type="text" value="M M"/> <input type="text" value="Y Y Y Y"/> <sub>month 91 year 92</sub><br><br>What kind of cancer? _____ <sup>93</sup><br>I was treated by a physician <sup>94</sup> <input type="checkbox"/> Yes <input type="checkbox"/> No                                                                                                                                                                                                                                                                                          |
| <p><b>Other serious diseases</b> <sup>95</sup><br/>(e.g. hypertension, diabetes, benign tumor)</p>   | <input type="checkbox"/> No | <input type="checkbox"/> Yes, which?<br>1. _____ <sup>96</sup> When? <input type="text" value="M M"/> <input type="text" value="Y Y Y Y"/> <sub>month 97 year 98</sub><br>I was treated by a physician <sup>99</sup> <input type="checkbox"/> Yes <input type="checkbox"/> No<br>2. _____ When? <input type="text" value="M M"/> <input type="text" value="Y Y Y Y"/> <sub>month year</sub><br>I was treated by a physician <input type="checkbox"/> Yes <input type="checkbox"/> No<br>If you have had more than 2 serious diseases, please use the space in the comment section on page 4. |
| <p><b>Operations</b> <sup>100</sup><br/>(excluding those listed in Q14)</p>                          | <input type="checkbox"/> No | <input type="checkbox"/> Yes, I had operation(s), which?<br>1. _____ <sup>101</sup> When? <input type="text" value="M M"/> <input type="text" value="Y Y Y Y"/> <sub>month 102 year 103</sub><br>2. _____ When? <input type="text" value="M M"/> <input type="text" value="Y Y Y Y"/> <sub>month year</sub><br>If you have had more than 2 operations, please use the space in the comment section on page 4.                                                                                                                                                                                |

**Relatives**

19. Has your mother or sister(s) been diagnosed with endometriosis?

- None <sup>104</sup>                       Mother <sup>105</sup>                       Sister(s) <sup>106</sup>

20. Have any of your parent(s) or sibling(s) been diagnosed with depression?

- None <sup>107</sup>                       Mother <sup>108</sup>                       Father <sup>109</sup>                       Sibling(s) <sup>110</sup>

21. Have any of your parent(s) or sibling(s) ever had a deep venous thrombosis (blood clot) or pulmonary embolism (blood clot in the lung)?

- None <sup>111</sup>                       Mother <sup>112</sup>                       Father <sup>113</sup>                       Sibling(s) <sup>114</sup>

**Mood**

22. We are interested in finding out about the impact of endometriosis and endometriosis treatment on your mood and whether this changes over the course of the study. Please answer these questions based on how you've felt over the last 4 weeks.

22a. Have you been feeling down, depressed or hopeless? <sup>115</sup>

- Never                       Rarely                       Sometimes                       Often                       Always

22b. Have you been feeling like you are a failure and have let down your friends and/or family? <sup>116</sup>

- Never                       Rarely                       Sometimes                       Often                       Always

22c. Have you felt happy or optimistic about the future? <sup>117</sup>

- Never                       Rarely                       Sometimes                       Often                       Always

**Lifestyle**

23. Do you regularly smoke cigarettes (at least one cigarette a day)? <sup>118</sup>

- Yes                      On average, how many cigarettes per day?     <sup>119</sup> Cigarettes
- No, stopped smoking                      On average, how many cigarettes a day did you smoke in the past?     <sup>119</sup> Cigarettes
- No, never smoked regularly

**Education**

24. What is your most advanced school or college degree? <sup>120</sup>

- No school-leaving certificate
- High school diploma
- Community college
- University / technical college

Please fill in today's date:

|     | 2 | 0 |      
day <sup>121</sup>    month <sup>122</sup>                      year <sup>123</sup>

**Comment**

Please tell us anything else you'd like us to know: <sup>124</sup>

Thanks a lot for your help!
