# Supplementary material for: Safety of Dienogest and Other Hormonal Treatments for Endometriosis in Real-World Clinical Practice (VIPOS): A Large Noninterventional Study
Source: PubMed Central journal article supplement — Adv Ther. 2020 Apr 16;37(5):2528–37. doi: 10.1007/s12325-020-01331-z (PMC7467487; doi:10.1007/s12325-020-01331-z), 2020-04-16
Supplement: 12325_2020_1331_MOESM2_ESM.pdf [file 12325_2020_1331_MOESM2_ESM.pdf]

# INAS-VIPOS

## – Follow-up Questionnaire No. [N] –

Country Physician no. Patient no. ID

If you have any questions, please call our free phone number: [telephone number]

### Endometriosis Treatment

1. Have you used any hormonal treatment for your endometriosis since we last heard from you in [month/year]?<sup>1</sup>

Yes → Please fill in *all* medications with dates and reasons for stopping / switching you have used since [month/year] in the table below

| Brand name of medication <sup>2</sup>                                                                                                                                                                                            | From                                                                                                                                                                               | To                  | Reasons for switching or stopping<br>(Please tick appropriate box) <sup>8</sup>                                                                                                                                                                                                            |                    |                   |                                                                                                                                                                                                                                  |                     |                                         |                    |                   |                                                                                                                                                                                                                                                                                                                             |
|----------------------------------------------------------------------------------------------------------------------------------------------------------------------------------------------------------------------------------|------------------------------------------------------------------------------------------------------------------------------------------------------------------------------------|---------------------|--------------------------------------------------------------------------------------------------------------------------------------------------------------------------------------------------------------------------------------------------------------------------------------------|--------------------|-------------------|----------------------------------------------------------------------------------------------------------------------------------------------------------------------------------------------------------------------------------|---------------------|-----------------------------------------|--------------------|-------------------|-----------------------------------------------------------------------------------------------------------------------------------------------------------------------------------------------------------------------------------------------------------------------------------------------------------------------------|
|                                                                                                                                                                                                                                  | <table border="0"> <tr> <td><u>  </u><u>  </u></td> <td><u>  </u><u>  </u><u>  </u><u>  </u></td> </tr> <tr> <td>month <sup>3</sup></td> <td>year <sup>4</sup></td> </tr> </table> | <u>  </u> <u>  </u> | <u>  </u> <u>  </u> <u>  </u> <u>  </u>                                                                                                                                                                                                                                                    | month <sup>3</sup> | year <sup>4</sup> | <table border="0"> <tr> <td><u>  </u><u>  </u></td> <td><u>  </u><u>  </u><u>  </u><u>  </u></td> </tr> <tr> <td>month <sup>5</sup></td> <td>year <sup>6</sup></td> </tr> </table> <input type="checkbox"/> ongoing <sup>7</sup> | <u>  </u> <u>  </u> | <u>  </u> <u>  </u> <u>  </u> <u>  </u> | month <sup>5</sup> | year <sup>6</sup> | <input type="checkbox"/> Trying to become pregnant<br><input type="checkbox"/> Treatment duration finished<br><input type="checkbox"/> Medication ineffective<br><input type="checkbox"/> Side-effects of medication<br>Which: _____ <sup>9</sup><br><input type="checkbox"/> Other (e.g. symptom free) _____ <sup>10</sup> |
| <u>  </u> <u>  </u>                                                                                                                                                                                                              | <u>  </u> <u>  </u> <u>  </u> <u>  </u>                                                                                                                                            |                     |                                                                                                                                                                                                                                                                                            |                    |                   |                                                                                                                                                                                                                                  |                     |                                         |                    |                   |                                                                                                                                                                                                                                                                                                                             |
| month <sup>3</sup>                                                                                                                                                                                                               | year <sup>4</sup>                                                                                                                                                                  |                     |                                                                                                                                                                                                                                                                                            |                    |                   |                                                                                                                                                                                                                                  |                     |                                         |                    |                   |                                                                                                                                                                                                                                                                                                                             |
| <u>  </u> <u>  </u>                                                                                                                                                                                                              | <u>  </u> <u>  </u> <u>  </u> <u>  </u>                                                                                                                                            |                     |                                                                                                                                                                                                                                                                                            |                    |                   |                                                                                                                                                                                                                                  |                     |                                         |                    |                   |                                                                                                                                                                                                                                                                                                                             |
| month <sup>5</sup>                                                                                                                                                                                                               | year <sup>6</sup>                                                                                                                                                                  |                     |                                                                                                                                                                                                                                                                                            |                    |                   |                                                                                                                                                                                                                                  |                     |                                         |                    |                   |                                                                                                                                                                                                                                                                                                                             |
|                                                                                                                                                                                                                                  | <table border="0"> <tr> <td><u>  </u><u>  </u></td> <td><u>  </u><u>  </u><u>  </u><u>  </u></td> </tr> <tr> <td>month</td> <td>year</td> </tr> </table>                           | <u>  </u> <u>  </u> | <u>  </u> <u>  </u> <u>  </u> <u>  </u>                                                                                                                                                                                                                                                    | month              | year              | <table border="0"> <tr> <td><u>  </u><u>  </u></td> <td><u>  </u><u>  </u><u>  </u><u>  </u></td> </tr> <tr> <td>month</td> <td>year</td> </tr> </table> <input type="checkbox"/> ongoing                                        | <u>  </u> <u>  </u> | <u>  </u> <u>  </u> <u>  </u> <u>  </u> | month              | year              | <input type="checkbox"/> Trying to become pregnant<br><input type="checkbox"/> Treatment duration finished<br><input type="checkbox"/> Medication ineffective<br><input type="checkbox"/> Side-effects of medication<br>Which: _____<br><input type="checkbox"/> Other (e.g. symptom free)                                  |
| <u>  </u> <u>  </u>                                                                                                                                                                                                              | <u>  </u> <u>  </u> <u>  </u> <u>  </u>                                                                                                                                            |                     |                                                                                                                                                                                                                                                                                            |                    |                   |                                                                                                                                                                                                                                  |                     |                                         |                    |                   |                                                                                                                                                                                                                                                                                                                             |
| month                                                                                                                                                                                                                            | year                                                                                                                                                                               |                     |                                                                                                                                                                                                                                                                                            |                    |                   |                                                                                                                                                                                                                                  |                     |                                         |                    |                   |                                                                                                                                                                                                                                                                                                                             |
| <u>  </u> <u>  </u>                                                                                                                                                                                                              | <u>  </u> <u>  </u> <u>  </u> <u>  </u>                                                                                                                                            |                     |                                                                                                                                                                                                                                                                                            |                    |                   |                                                                                                                                                                                                                                  |                     |                                         |                    |                   |                                                                                                                                                                                                                                                                                                                             |
| month                                                                                                                                                                                                                            | year                                                                                                                                                                               |                     |                                                                                                                                                                                                                                                                                            |                    |                   |                                                                                                                                                                                                                                  |                     |                                         |                    |                   |                                                                                                                                                                                                                                                                                                                             |
|                                                                                                                                                                                                                                  | <table border="0"> <tr> <td><u>  </u><u>  </u></td> <td><u>  </u><u>  </u><u>  </u><u>  </u></td> </tr> <tr> <td>month</td> <td>year</td> </tr> </table>                           | <u>  </u> <u>  </u> | <u>  </u> <u>  </u> <u>  </u> <u>  </u>                                                                                                                                                                                                                                                    | month              | year              | <table border="0"> <tr> <td><u>  </u><u>  </u></td> <td><u>  </u><u>  </u><u>  </u><u>  </u></td> </tr> <tr> <td>month</td> <td>year</td> </tr> </table> <input type="checkbox"/> ongoing                                        | <u>  </u> <u>  </u> | <u>  </u> <u>  </u> <u>  </u> <u>  </u> | month              | year              | <input type="checkbox"/> Trying to become pregnant<br><input type="checkbox"/> Treatment duration finished<br><input type="checkbox"/> Medication ineffective<br><input type="checkbox"/> Side-effects of medication<br>Which: _____<br><input type="checkbox"/> Other (e.g. symptom free)                                  |
| <u>  </u> <u>  </u>                                                                                                                                                                                                              | <u>  </u> <u>  </u> <u>  </u> <u>  </u>                                                                                                                                            |                     |                                                                                                                                                                                                                                                                                            |                    |                   |                                                                                                                                                                                                                                  |                     |                                         |                    |                   |                                                                                                                                                                                                                                                                                                                             |
| month                                                                                                                                                                                                                            | year                                                                                                                                                                               |                     |                                                                                                                                                                                                                                                                                            |                    |                   |                                                                                                                                                                                                                                  |                     |                                         |                    |                   |                                                                                                                                                                                                                                                                                                                             |
| <u>  </u> <u>  </u>                                                                                                                                                                                                              | <u>  </u> <u>  </u> <u>  </u> <u>  </u>                                                                                                                                            |                     |                                                                                                                                                                                                                                                                                            |                    |                   |                                                                                                                                                                                                                                  |                     |                                         |                    |                   |                                                                                                                                                                                                                                                                                                                             |
| month                                                                                                                                                                                                                            | year                                                                                                                                                                               |                     |                                                                                                                                                                                                                                                                                            |                    |                   |                                                                                                                                                                                                                                  |                     |                                         |                    |                   |                                                                                                                                                                                                                                                                                                                             |
|                                                                                                                                                                                                                                  | <table border="0"> <tr> <td><u>  </u><u>  </u></td> <td><u>  </u><u>  </u><u>  </u><u>  </u></td> </tr> <tr> <td>month</td> <td>year</td> </tr> </table>                           | <u>  </u> <u>  </u> | <u>  </u> <u>  </u> <u>  </u> <u>  </u>                                                                                                                                                                                                                                                    | month              | year              | <table border="0"> <tr> <td><u>  </u><u>  </u></td> <td><u>  </u><u>  </u><u>  </u><u>  </u></td> </tr> <tr> <td>month</td> <td>year</td> </tr> </table> <input type="checkbox"/> ongoing                                        | <u>  </u> <u>  </u> | <u>  </u> <u>  </u> <u>  </u> <u>  </u> | month              | year              | <input type="checkbox"/> Trying to become pregnant<br><input type="checkbox"/> Treatment duration finished<br><input type="checkbox"/> Medication ineffective<br><input type="checkbox"/> Side-effects of medication<br>Which: _____<br><input type="checkbox"/> Other (e.g. symptom free)                                  |
| <u>  </u> <u>  </u>                                                                                                                                                                                                              | <u>  </u> <u>  </u> <u>  </u> <u>  </u>                                                                                                                                            |                     |                                                                                                                                                                                                                                                                                            |                    |                   |                                                                                                                                                                                                                                  |                     |                                         |                    |                   |                                                                                                                                                                                                                                                                                                                             |
| month                                                                                                                                                                                                                            | year                                                                                                                                                                               |                     |                                                                                                                                                                                                                                                                                            |                    |                   |                                                                                                                                                                                                                                  |                     |                                         |                    |                   |                                                                                                                                                                                                                                                                                                                             |
| <u>  </u> <u>  </u>                                                                                                                                                                                                              | <u>  </u> <u>  </u> <u>  </u> <u>  </u>                                                                                                                                            |                     |                                                                                                                                                                                                                                                                                            |                    |                   |                                                                                                                                                                                                                                  |                     |                                         |                    |                   |                                                                                                                                                                                                                                                                                                                             |
| month                                                                                                                                                                                                                            | year                                                                                                                                                                               |                     |                                                                                                                                                                                                                                                                                            |                    |                   |                                                                                                                                                                                                                                  |                     |                                         |                    |                   |                                                                                                                                                                                                                                                                                                                             |
| <input type="checkbox"/> No, I have not used any hormonal treatment for endometriosis since [month/year] until today.<br>→ Please provide the reason for not using the prescribed medication(s) by checking the appropriate box. |                                                                                                                                                                                    |                     | <input type="checkbox"/> Trying to become pregnant<br><input type="checkbox"/> Treatment duration finished<br><input type="checkbox"/> Medication ineffective<br><input type="checkbox"/> Side-effects of medication<br>Which: _____<br><input type="checkbox"/> Other (e.g. symptom free) |                    |                   |                                                                                                                                                                                                                                  |                     |                                         |                    |                   |                                                                                                                                                                                                                                                                                                                             |

2. Since we last heard from you in [month/year], have you had surgery/laparoscopy because of your endometriosis?<sup>11</sup>

No → Go to question 3       Yes

If **yes**, please specify the type and date of surgery (if known) in the table below (i.e. excision of lesions, removal of ovarian cyst, hysterectomy, colonoscopy, keyhole surgery, diagnostic laparoscopy) For additional space, use comment section.

| Operation <sup>12</sup> | Date                                                                                                                                                                                 |                     |                                         |                     |                    |
|-------------------------|--------------------------------------------------------------------------------------------------------------------------------------------------------------------------------------|---------------------|-----------------------------------------|---------------------|--------------------|
|                         | <table border="0"> <tr> <td><u>  </u><u>  </u></td> <td><u>  </u><u>  </u><u>  </u><u>  </u></td> </tr> <tr> <td>month <sup>13</sup></td> <td>year <sup>14</sup></td> </tr> </table> | <u>  </u> <u>  </u> | <u>  </u> <u>  </u> <u>  </u> <u>  </u> | month <sup>13</sup> | year <sup>14</sup> |
| <u>  </u> <u>  </u>     | <u>  </u> <u>  </u> <u>  </u> <u>  </u>                                                                                                                                              |                     |                                         |                     |                    |
| month <sup>13</sup>     | year <sup>14</sup>                                                                                                                                                                   |                     |                                         |                     |                    |
|                         | <table border="0"> <tr> <td><u>  </u><u>  </u></td> <td><u>  </u><u>  </u><u>  </u><u>  </u></td> </tr> <tr> <td>month</td> <td>year</td> </tr> </table>                             | <u>  </u> <u>  </u> | <u>  </u> <u>  </u> <u>  </u> <u>  </u> | month               | year               |
| <u>  </u> <u>  </u>     | <u>  </u> <u>  </u> <u>  </u> <u>  </u>                                                                                                                                              |                     |                                         |                     |                    |
| month                   | year                                                                                                                                                                                 |                     |                                         |                     |                    |

### Medical History

3. We last heard from you in [month/year]. Since then, have you had any of the following diseases?

|                                                                                                                                           |                             |                                                                                                                                                                                                                                                                                                                                                                                                                                                                                                                                                                               |                     |                                         |                     |                    |  |
|-------------------------------------------------------------------------------------------------------------------------------------------|-----------------------------|-------------------------------------------------------------------------------------------------------------------------------------------------------------------------------------------------------------------------------------------------------------------------------------------------------------------------------------------------------------------------------------------------------------------------------------------------------------------------------------------------------------------------------------------------------------------------------|---------------------|-----------------------------------------|---------------------|--------------------|--|
| Anemia <sup>15</sup>                                                                                                                      | <input type="checkbox"/> No | <input type="checkbox"/> Yes, diagnosed in <table border="0"><tr><td><u>  </u><u>  </u></td><td><u>  </u><u>  </u><u>  </u><u>  </u></td></tr><tr><td>month <sup>16</sup></td><td>year <sup>17</sup></td></tr></table>                                                                                                                                                                                                                                                                                                                                                        | <u>  </u> <u>  </u> | <u>  </u> <u>  </u> <u>  </u> <u>  </u> | month <sup>16</sup> | year <sup>17</sup> |  |
|                                                                                                                                           | <u>  </u> <u>  </u>         | <u>  </u> <u>  </u> <u>  </u> <u>  </u>                                                                                                                                                                                                                                                                                                                                                                                                                                                                                                                                       |                     |                                         |                     |                    |  |
| month <sup>16</sup>                                                                                                                       | year <sup>17</sup>          |                                                                                                                                                                                                                                                                                                                                                                                                                                                                                                                                                                               |                     |                                         |                     |                    |  |
|                                                                                                                                           |                             | I was treated by a physician <sup>66</sup> <input type="checkbox"/> Yes <input type="checkbox"/> No<br>I was treated with iron tablets <sup>18</sup> <input type="checkbox"/> Yes <input type="checkbox"/> No<br>I was treated with an iron infusion <sup>19</sup> <input type="checkbox"/> Yes <input type="checkbox"/> No<br>I was treated with a blood transfusion <sup>20</sup> <input type="checkbox"/> Yes <input type="checkbox"/> No<br>Other treatment? <sup>21</sup> <input type="checkbox"/> Yes <input type="checkbox"/> No<br>If yes, which? _____ <sup>22</sup> |                     |                                         |                     |                    |  |
| Deep venous thrombosis<br>OR Pulmonary embolism <sup>23</sup><br>(blood clot in the deep veins e.g. legs/arms or blood clots in the lung) | <input type="checkbox"/> No | <input type="checkbox"/> Yes, in <table border="0"><tr><td><u>  </u><u>  </u></td><td><u>  </u><u>  </u><u>  </u><u>  </u></td></tr><tr><td>month <sup>24</sup></td><td>year <sup>25</sup></td></tr></table>                                                                                                                                                                                                                                                                                                                                                                  | <u>  </u> <u>  </u> | <u>  </u> <u>  </u> <u>  </u> <u>  </u> | month <sup>24</sup> | year <sup>25</sup> |  |
|                                                                                                                                           | <u>  </u> <u>  </u>         | <u>  </u> <u>  </u> <u>  </u> <u>  </u>                                                                                                                                                                                                                                                                                                                                                                                                                                                                                                                                       |                     |                                         |                     |                    |  |
| month <sup>24</sup>                                                                                                                       | year <sup>25</sup>          |                                                                                                                                                                                                                                                                                                                                                                                                                                                                                                                                                                               |                     |                                         |                     |                    |  |
|                                                                                                                                           |                             | I was treated by a physician <sup>26</sup> <input type="checkbox"/> Yes <input type="checkbox"/> No<br>I was treated with blood-thinning drugs <sup>27</sup> <input type="checkbox"/> Yes <input type="checkbox"/> No<br>If yes which drugs? _____ <sup>28</sup>                                                                                                                                                                                                                                                                                                              |                     |                                         |                     |                    |  |

|                                                                                                                               |                             |                                                                                                                                                                                                                                                                                                                                                                                                                                                                                                                                                                       |
|-------------------------------------------------------------------------------------------------------------------------------|-----------------------------|-----------------------------------------------------------------------------------------------------------------------------------------------------------------------------------------------------------------------------------------------------------------------------------------------------------------------------------------------------------------------------------------------------------------------------------------------------------------------------------------------------------------------------------------------------------------------|
| <b>Depression requiring treatment</b> <sup>29</sup>                                                                           | <input type="checkbox"/> No | <input type="checkbox"/> Yes, diagnosed in <input type="text" value="M M"/> <input type="text" value="Y Y Y Y"/> <sup>30 31</sup><br>I was treated by a general practitioner <sup>32</sup> <input type="checkbox"/> Yes <input type="checkbox"/> No<br>I was treated by a psychiatrist <sup>33</sup> <input type="checkbox"/> Yes <input type="checkbox"/> No<br>I was admitted to hospital <sup>34</sup> <input type="checkbox"/> Yes <input type="checkbox"/> No<br>Attempted Suicide <sup>35</sup> <input type="checkbox"/> Yes <input type="checkbox"/> No        |
| <b>Other serious diseases / operations</b> <sup>36</sup><br>(incl. gynecological diseases, hypertension, diabetes and cancer) | <input type="checkbox"/> No | <input type="checkbox"/> Yes, which?<br>1. _____ <sup>37</sup> When? <input type="text" value="M M"/> <input type="text" value="Y Y Y Y"/> <sup>38 39</sup><br>I was treated by a physician <sup>40</sup> <input type="checkbox"/> Yes <input type="checkbox"/> No<br>2. _____ When? <input type="text" value="M M"/> <input type="text" value="Y Y Y Y"/> <sup>38 39</sup><br>I was treated by a physician <input type="checkbox"/> Yes <input type="checkbox"/> No<br><i>If you have had more than 2 serious diseases/operations, please use the comment field.</i> |

**Medications**

**4. Are you taking any other medication on a regular basis?** (NOT including the medication(s) listed in question 1.) <sup>41</sup>

No  Yes, which one(s)? (please use brand name if known)

\_\_\_\_\_ <sup>42</sup>

**Hospitalization**

**5a. With the exception of child delivery, have you been admitted to a hospital (for at least one night) since [month/year]?** <sup>43</sup>

No → Go to question 6  Yes When was it?   <sup>44 45</sup>

If yes, was the hospital stay planned? <sup>46</sup>

No  Yes

**5b. What was the reason for this hospital stay?** (Please be as specific as possible)

\_\_\_\_\_ <sup>47</sup>

**5c. Was an operation performed?** <sup>48</sup>

No  Yes When was it?   <sup>49 50</sup>

If yes, please specify the type of operation: \_\_\_\_\_ <sup>51</sup>

**Weight**

**6. What is your weight?**   kg <sup>52</sup>

**Pregnancy**

**7a. Have you had a baby since [month/year]?** <sup>53</sup>

No → Go to question 8a  Yes When was the delivery?    <sup>54 55 56</sup>

**7b. Have there been any serious health issues or problems with the newborn?** <sup>57</sup>

No  Yes

If yes, please specify the types of problems: \_\_\_\_\_ <sup>58</sup>

**Mood**

**We are interested in the impact of endometriosis and endometriosis treatment on your mood and whether this changes over the course of the study. Please answer these questions based on how you've felt over the last 4 weeks.**

**8a. Have you been feeling down, depressed or hopeless?** <sup>59</sup>

Never  Rarely  Sometimes  Often  Always

**8b. Have you been feeling like you are a failure and have let down your friends and/or family?** <sup>60</sup>

Never  Rarely  Sometimes  Often  Always

**8c. Have you felt happy or optimistic about the future?** <sup>61</sup>

Never  Rarely  Sometimes  Often  Always

Please fill in today's date:     <sup>62 63 64</sup>

**Comment**

Please tell us anything else you'd like us to know: <sup>65</sup>

\_\_\_\_\_

Thank you for your help with this study!
